# Supplementary material
Source: PubMed Central journal article supplement (PMC6597819)
Supplement: supp_RA119.007655_143246_1_supp_321606_pq1l11.pdf [file supp_RA119.007655_143246_1_supp_321606_pq1l11.pdf]

Supplemental Table 1. Mass Spectrometry Analysis of BCL9-containing Protein Complex

| Molecular weights | Protein | Sequence                                   | # PSMs | # Protein | # Protein Groups | q-Value | PEP         | XCorr     | Charge | MH <sup>+</sup> (Da) | ΔM (ppm)     | RT (min)  | # Missed Cleavages |
|-------------------|---------|--------------------------------------------|--------|-----------|------------------|---------|-------------|-----------|--------|----------------------|--------------|-----------|--------------------|
| 149.2 kDa         | BCL9    | SPQTSQLAGMLAGPAAASIKSPVLDGPQAAASQSLGK      | 1      | 1         | 1                | 0       | 1.374E-08   | 9.261858  | 4      | 3578.931051          | -1.52568477  | 29.4821   | 1                  |
|                   |         | KPLDLSVAGSQVSHGPNLKRSLMTMHQVQSPMLGSPGSLNKL | 3      | 1         | 1                | 0       | 6.291E-08   | 8.223343  | 4      | 4234.208639          | -0.63152177  | 27.500618 | 1                  |
|                   |         | KQEVVYVQQLQDMVMVHQHGR                      | 44     | 1         | 1                | 0       | 2.02979E-13 | 8.0725288 | 3      | 2762.32724           | -0.438642816 | 23.58706  | 1                  |
|                   |         | KFLDLSVAGSQVSHGPNLKRSLMTMHQVQSPMLGSPGSLNKL | 52     | 1         | 1                | 0       | 2.159E-10   | 7.8309608 | 3      | 2157.20029           | -1.131466564 | 24.94161  | 1                  |
|                   |         | KQEVVYVQQLQDMVMVHQHGR                      | 47     | 1         | 1                | 0       | 3.474E-07   | 7.5702691 | 4      | 2804.326803          | -0.45661399  | 25.105293 | 1                  |
|                   |         | APPTPSSVSEPTLLENGDGLSQEQLHEHR              | 96     | 1         | 1                | 0       | 7.864E-07   | 7.4736662 | 4      | 3132.514547          | -2.826555708 | 23.020286 | 0                  |
|                   |         | SKQVMVRPPTVMSFGNGPQLDLSK                   | 28     | 1         | 1                | 0       | 2.943E-09   | 7.2547736 | 3      | 2612.31406           | -1.21014153  | 23.431303 | 1                  |
|                   |         | RKQEVVYVQQLQDMVMVHQHGR                     | 28     | 1         | 1                | 0       | 3.75E-12    | 7.004718  | 3      | 2918.432529          | 1.012176743  | 26.857561 | 2                  |
|                   |         | KFEGPIQAMMAQSQSLGK                         | 2      | 1         | 1                | 0       | 5.669E-10   | 6.9905575 | 2      | 19003.57079          | -2.61050171  | 27.690206 | 0                  |
|                   |         | APPTPSSVSEPTLLENGDGLSQEQLHEHR              | 29     | 1         | 1                | 0       | 0.000001695 | 6.9447894 | 4      | 3417.659322          | -2.281923244 | 22.604397 | 1                  |
|                   |         | QEVVYVQQLQDMVMVHQHGR                       | 17     | 1         | 1                | 0       | 9.274E-09   | 6.9172201 | 3      | 2634.22739           | -2.313843766 | 24.128281 | 0                  |
|                   |         | mLFPDEKFTGASGGPQNGVLDGPQKKEGPIQAMMAQSQSLGK | 1      | 1         | 1                | 0       | 0.0001844   | 6.6300807 | 5      | 4970.400825          | -2.330027252 | 29.256227 | 1                  |
|                   |         | SKQVMVRPPTVMSFGNGPQLDLSK                   | 55     | 1         | 1                | 0       | 8.697E-07   | 6.4316688 | 3      | 2628.303196          | -3.401643499 | 21.895667 | 2                  |
|                   |         | FPNPGQLSEEMFQQLAEK                         | 28     | 1         | 1                | 0       | 1.679E-07   | 6.3931843 | 2      | 2221.055468          | 1.016154272  | 22.155227 | 0                  |
|                   |         | SPTMHQVQSPMLGSPGSLNKL                      | 21     | 1         | 1                | 0       | 0.00002632  | 6.3158154 | 3      | 2096.027317          | 0.427268853  | 21.306558 | 0                  |
|                   |         | KPLDLSVAGSQVSHGPNLKR                       | 1      | 1         | 1                | 0       | 4.991E-09   | 6.3154044 | 3      | 2199.211826          | -0.66849198  | 25.122986 | 0                  |
|                   |         | SQDSQHTPHSMTPSNATAPR                       | 104    | 1         | 1                | 0       | 0.000001789 | 6.2724853 | 3      | 2165.95676           | -2.85646598  | 12.973574 | 0                  |
|                   |         | LSHMPPPLNPNSSPFLTPAPPVQR                   | 41     | 1         | 1                | 0       | 7.967E-08   | 6.260047  | 3      | 2765.43131           | -3.254704919 | 25.437248 | 0                  |
|                   |         | KQEVVYVQQLQDMVMVHQHGR                      | 66     | 1         | 1                | 0       | 4.242E-07   | 6.209187  | 4      | 2778.321676          | -0.609836017 | 24.189098 | 1                  |
|                   |         | DPGTPNDDSDIKELNSADHIIK                     | 3      | 1         | 1                | 0       | 0.0001116   | 6.2007127 | 4      | 2327.996699          | -3.26304195  | 15.390381 | 1                  |
|                   |         | EFTGASGGPQNGVLDGPQKKEGPIQAMMAQSQSLGK       | 1      | 1         | 1                | 0       | 0.00000404  | 6.1334686 | 4      | 4109.997213          | -1.195429338 | 22.75842  | 1                  |
|                   |         | KQPGPFGFSHMQGMQEGQAPR                      | 9      | 1         | 1                | 0       | 0.000009073 | 6.1322208 | 3      | 2453.123813          | -1.405493992 | 22.818824 | 1                  |
|                   |         | sQDSQHTPHSMTPSNATAPR                       | 49     | 1         | 1                | 0       | 0.000003395 | 6.0142829 | 3      | 2191.97147           | -3.251228805 | 15.06655  | 1                  |
|                   |         | mLFPDEKFTGASGGPQNGVLDGPQKKEGPIQAMMAQSQSLGK | 3      | 1         | 1                | 0       | 0.00002805  | 5.9697183 | 3      | 3088.46262           | -1.808893007 | 24.834698 | 1                  |
|                   |         | SKQVMVRPPTVMSFGNGPQLDLSK                   | 14     | 1         | 1                | 0       | 2.029E-07   | 5.962305  | 3      | 2644.302219          | -1.827358107 | 20.87607  | 1                  |
|                   |         | GQVEVYVQHSONNKKTER                         | 26     | 1         | 1                | 0       | 1.068E-08   | 5.946939  | 3      | 2414.23917           | -1.317767315 | 25.188929 | 1                  |
|                   |         | LSHMPPPLNPNSSPFLTPAPPVQR                   | 13     | 1         | 1                | 0       | 0.00001131  | 5.9463472 | 3      | 2807.448643          | -0.83594399  | 26.980843 | 1                  |
|                   |         | GERFPNPGQLSEEMFQQLAEK                      | 23     | 1         | 1                | 0       | 0.00000013  | 5.9707224 | 3      | 2563.220371          | -1.685470997 | 27.975166 | 1                  |
|                   |         | QEVVYVQQLQDMVMVHQHGR                       | 23     | 1         | 1                | 0       | 0.000001536 | 5.7823024 | 3      | 2413.179355          | -2.395536238 | 21.832955 | 0                  |
|                   |         | sQDSQHTPHSMTPSNATAPR                       | 37     | 1         | 1                | 0       | 0.000009491 | 5.7769718 | 3      | 2207.971226          | -1.035222461 | 12.69886  | 0                  |
|                   |         | QEVVYVQQLQDMVMVHQHGR                       | 9      | 1         | 1                | 0       | 0.00005151  | 5.7420564 | 3      | 2429.1749            | -1.220648044 | 20.344577 | 0                  |
|                   |         | SKQVMVRPPTVMSFGNGPQLDLSK                   | 5      | 1         | 1                | 0       | 0.000002668 | 5.7331738 | 2      | 2654.319736          | -3.05372133  | 23.442284 | 1                  |
|                   |         | SPQTSQLAGMLAGPAAASIK                       | 86     | 1         | 1                | 0       | 0.00000124  | 5.6662292 | 2      | 2067.089662          | -1.673678376 | 28.00991  | 0                  |
|                   |         | FPNPGQLSEEMFQQLAEK                         | 13     | 1         | 1                | 0       | 2.182E-07   | 5.6652346 | 2      | 2237.050096          | -1.931057839 | 25.989153 | 0                  |
|                   |         | LSHMPPPLNPNSSPFLTPAPPVQR                   | 33     | 1         | 1                | 0       | 4.559E-07   | 5.6538143 | 3      | 2781.434299          | -0.776428427 | 24.13296  | 0                  |
|                   |         | KFEGPIQAMMAQSQSLGK                         | 1      | 1         | 1                | 0       | 0.00000325  | 5.641124  | 3      | 1916.953847          | -1.72616383  | 20.479874 | 0                  |
|                   |         | QEVVYVQQLQDMVMVHQHGR                       | 20     | 1         | 1                | 0       | 0.000000212 | 5.6238648 | 3      | 2397.186191          | -1.08117415  | 23.055856 | 0                  |
|                   |         | nDPKLPQPPAPAPAQDQNSQNTR                    | 33     | 1         | 1                | 0       | 7.438E-08   | 5.6278648 | 3      | 2784.32352           | -2.214476689 | 16.562792 | 0                  |
|                   |         | SQDSQHTPHSMTPSNATAPR                       | 64     | 1         | 1                | 0       | 2.488E-07   | 5.611667  | 3      | 2149.964695          | -1.558188702 | 15.50307  | 0                  |
|                   |         | QKPGPFGFSHMQGMQEGQAPR                      | 2      | 1         | 1                | 0       | 0.000002624 | 5.6096237 | 3      | 2225.03989           | 3.268249034  | 22.825539 | 0                  |
|                   |         | SEASDSDIKELNSADHIIK                        | 40     | 1         | 1                | 0       | 0.00000298  | 5.5969979 | 4      | 3434.099979          | -1.754469999 | 25.620419 | 2                  |
|                   |         | EFTGASGGPQNGVLDGPQKKEGPIQAMMAQSQSLGK       | 3      | 1         | 1                | 0       | 0.000004732 | 5.5791206 | 4      | 4904.000041          | -1.471645664 | 27.607303 | 2                  |
|                   |         | SPQTSQLAGMLAGPAAASIK                       | 26     | 1         | 1                | 0       | 0.001456    | 5.58057   | 3      | 2083.08762           | 1.096114029  | 25.404057 | 0                  |
|                   |         | NDPKLPQPPAPAPAQDQNSQNTR                    | 70     | 1         | 1                | 0       | 3.421E-07   | 5.5109372 | 3      | 2742.313083          | -2.201729367 | 15.454573 | 0                  |
|                   |         | SNLPSMNNMPCMGINTQNPTR                      | 13     | 1         | 1                | 0       | 0.000003085 | 5.5094122 | 4      | 2695.536473          | -3.000956623 | 25.549995 | 0                  |
|                   |         | STPSSHQGTATEPFAKTA                         | 14     | 1         | 1                | 0       | 0.000002016 | 5.4692349 | 3      | 2223.147678          | -2.089021173 | 11.920644 | 1                  |
|                   |         | GERFPNPGQLSEEMFQQLAEK                      | 6      | 1         | 1                | 0       | 0.00001419  | 5.4650331 | 3      | 2579.213338          | -3.205800392 | 25.382629 | 1                  |
|                   |         | mLFPDEKFTGASGGPQNGVLDGPQKKEGPIQAMMAQSQSLGK | 3      | 1         | 1                | 0       | 0.000129    | 5.4366055 | 4      | 4954.420065          | 0.519405141  | 29.896692 | 1                  |
|                   |         | SPTMHQVQSPMLGSPGSLNKL                      | 17     | 1         | 1                | 0       | 0.000002357 | 5.3788095 | 3      | 2112.018284          | -1.445364352 | 19.327568 | 0                  |
|                   |         | KQEVVYVQQLQDMVMVHQHGR                      | 24     | 1         | 1                | 0       | 0.000000427 | 5.3468696 | 4      | 2794.32762           | -0.427187209 | 24.449229 | 1                  |
|                   |         | SNLPSMNNMPCMGINTQNPTR                      | 28     | 1         | 1                | 0       | 0.0007352   | 5.3021388 | 3      | 2286.060032          | 7.666207665  | 25.643032 | 0                  |
|                   |         | mLFPDEKFTGASGGPQNGVLDGPQKKEGPIQAMMAQSQSLGK | 31     | 1         | 1                | 0       | 0.00002913  | 5.2776227 | 3      | 3072.465793          | -2.440342974 | 25.865889 | 1                  |
|                   |         | GQVEVYVQHSONNKKTER                         | 6      | 1         | 1                | 0       | 0.000003327 | 5.224306  | 3      | 2028.046299          | -2.294079391 | 25.51298  | 0                  |
|                   |         | TPAKVYVSTEMANK                             | 27     | 1         | 1                | 0       | 0.000002589 | 5.1953478 | 2      | 1784.20225           | 1.032875073  | 16.246465 | 0                  |
|                   |         | KFEGPIQAMMAQSQSLGK                         | 2      | 1         | 1                | 0       | 4.089E-07   | 5.1401834 | 3      | 2365.216062          | 0.981338279  | 27.62949  | 1                  |
|                   |         | KQEVVYVQQLQDMVMVHQHGR                      | 4      | 1         | 1                | 0       | 0.000003984 | 5.1309953 | 3      | 2820.336155          | 0.78694797   | 21.689098 | 1                  |
|                   |         | SNLPSMNNMPCMGINTQNPTR                      | 17     | 1         | 1                | 0       | 0.000002687 | 5.120834  | 3      | 2270.046543          | -0.46182251  | 25.446012 | 0                  |
|                   |         | KFEGPIQAMMAQSQSLGK                         | 2      | 1         | 1                | 0       | 0.000132    | 5.0444627 | 3      | 1932.948093          | -1.954561345 | 15.884639 | 0                  |
|                   |         | STPSSHQGTATEPFAKTA                         | 13     | 1         | 1                | 0       | 0.000000841 | 4.9929346 | 2      | 2492.195941          | -2.19207618  | 15.82487  | 2                  |
|                   |         | SPPVLSAAASVHVLK                            | 44     | 1         | 1                | 0       | 0.000004013 | 4.9422569 | 2      | 1530.860033          | -2.546509546 | 22.194832 | 0                  |
|                   |         | KQPGPFGFSHMQGMQEGQAPR                      | 21     | 1         | 1                | 0       | 0.00003651  | 4.8928064 | 4      | 2469.120992          | -0.47498198  | 19.988052 | 1                  |
|                   |         | SPTMHQVQSPMLGSPGSLNKL                      | 13     | 1         | 1                | 0       | 0.000008001 | 4.8750916 | 3      | 2128.015842          | -0.192217642 | 17.70993  | 0                  |
|                   |         | sFTMHQVQSPMLGSPGSLNKL                      | 1      | 1         | 1                | 0       | 0.00000341  | 4.869978  | 3      | 2138.030663          | -3.237957641 | 21.281913 | 0                  |
|                   |         | GPGRPTDVGAPPQGR                            | 6      | 1         | 1                | 0       | 0.00001543  | 4.8433661 | 3      | 1802.899814          | -2.649550563 | 18.782991 | 1                  |
|                   |         | QGSASQSPSPDSSKSGGHPTK                      | 7      | 1         | 1                | 0       | 0.00000693  | 4.7757268 | 3      | 2285.015781          | -2.373759248 | 10.366214 | 1                  |
|                   |         | mLFPDEKFTGASGGPQNGVLDGPQKKEGPIQAMMAQSQSLGK | 6      | 1         | 1                | 0       | 0.0001421   | 4.7232025 | 3      | 3114.478245          | -1.801810125 | 22.724699 | 1                  |
|                   |         | MVPLFGEHPQEQYVYGMGPRFLPMSGQPGSGNSGLR       | 1      | 1         | 1                | 0       | 0.0009637   | 4.6882322 | 4      | 3827.815817          | 1.707319445  | 27.093799 | 0                  |
|                   |         | LQPTPAPAPKAPKAPAPRPLDR                     | 14     | 1         | 1                | 0       | 0.0002901   | 4.6693079 | 3      | 3272.773872          | -0.17582948  | 24.99953  | 1                  |
|                   |         | KQPGPFGFSHMQGMQEGQAPR                      | 5      | 1         | 1                | 0       | 0.0001318   | 4.6143193 | 4      | 2485.114156          | -1.18097266  | 18.149484 | 1                  |
|                   |         | RKQEVVYVQQLQDMVMVHQHGR                     | 28     | 1         | 1                | 0       | 0.00005439  | 4.6018634 | 5      | 2934.419685          | -1.637566064 | 22.869793 | 2                  |
|                   |         | sPTQTSQLAGMLAGPAAASIK                      | 4      | 1         | 1                | 0       | 0.00000126  | 4.5988123 | 2      | 2109.049402          | -3.29247716  | 28.02607  | 0                  |
|                   |         | RKQEVVYVQQLQDMVMVHQHGR                     | 2      | 1         | 1                | 0       | 0.00027     | 4.5934649 | 5      | 2950.517807          | -1.229167807 | 20.47927  | 0                  |
|                   |         | EFTGASGGPQNGVLDGPQKKEGPIQAMMAQSQSLGK       | 24     | 1         | 1                | 0       | 0.000236    | 4.5529041 | 2      | 2212.199862          | -1.642362198 | 19.878287 | 1                  |
|                   |         | SNLPSMNNMPCMGINTQNPTR                      | 7      | 1         | 1                | 0       | 0.0000469   | 4.5079484 | 3      | 2302.03397           | -1.499370047 | 20.707529 | 1                  |
|                   |         | QEVVYVQQLQDMVMVHQHGR                       | 9      | 1         | 1                | 0       | 0.000001355 | 4.5023928 | 3      | 2650.225681          | -1.026016395 | 20.735142 | 0                  |
|                   |         | mVPLFGEHPQEQYVYGMGPRFLPMSGQPGSGNSGLR       | 14     | 1         | 1                | 0       | 0.000002177 | 4.4211946 | 4      | 3811.806295          | -2.117416095 | 28.729417 | 0                  |
|                   |         | SPPVLSAAASVHVLK                            | 39     | 1         | 1                |         |             |           |        |                      |              |           |                    |

|                                     |             |           |             |             |              |              |             |              |              |           |   |
|-------------------------------------|-------------|-----------|-------------|-------------|--------------|--------------|-------------|--------------|--------------|-----------|---|
| FSNOGKQGSASQSPSSDK                  | 1           | 1         | 1           | 0           | 0.002869     | 2.7346618    | 3           | 2282.00626   | -1.772809212 | 10.866039 | 1 |
| ELFPmVPSGMK                         | 24          | 1         | 1           | 0           | 0.001718     | 2.7240322    | 2           | 1340.61508   | -0.79197648  | 24.122075 | 0 |
| eLEFGVPSGMK                         | 17          | 1         | 1           | 0           | 0.000545     | 2.7190273    | 2           | 1366.6325    | -4.37319755  | 28.31642  | 0 |
| QEUVVQoSSLQDmMvHQHSPR               | 2           | 1         | 1           | 0           | 0.002457     | 2.6705663    | 3           | 2666.219761  | -1.333192863 | 18.170224 | 0 |
| IShmPLLNPNSSNTLNTAPPVQR             | 1           | 1         | 1           | 0           | 0.03119      | 2.6656101    | 4           | 2823.443502  | -0.853266144 | 24.419952 | 0 |
| ERSLQTLR                            | 3           | 2         | 1           | 0           | 0.03204      | 2.6649168    | 2           | 1002.571215  | 2.097896795  | 15.668386 | 1 |
| hmEPCGNPNFPR                        | 35          | 1         | 1           | 0           | 0.0001995    | 2.611582     | 2           | 1466.682299  | -1.56386608  | 21.580518 | 0 |
| ERKSIDFSQDR                         | 1           | 1         | 1           | 0           | 0.0007428    | 2.5580046    | 2           | 1410.659149  | -1.0717991   | 18.528173 | 1 |
| gmAPHNMPSQMR                        | 11          | 1         | 1           | 0           | 0.002713     | 2.541267     | 3           | 1568.674238  | -1.614619322 | 17.29083  | 0 |
| SISADSFQR                           | 46          | 1         | 1           | 0           | 0.001915     | 2.501139     | 2           | 1125.515428  | -1.52182872  | 17.464131 | 0 |
| ALPGPGCSngLk                        | 32          | 1         | 1           | 0           | 0.01826      | 2.4106598    | 2           | 1100.57683   | -0.09674438  | 19.699667 | 1 |
| gPFFPYQmPSEWAGVPGTTEPFDGmMHPHSLPR   | 0.01691     | 1         | 1           | 0           | 0.04823      | 2.408528     | 4           | 3759.73818   | -4.61438687  | 26.74689  | 0 |
| SISADSFQR                           | 12          | 1         | 1           | 0           | 0.01795      | 2.4002945    | 2           | 1167.526603  | -0.687977723 | 20.71272  | 0 |
| ALPGPGCSmgLk                        | 32          | 1         | 1           | 0           | 0.01549      | 2.3467889    | 2           | 1084.581835  | -0.172040384 | 21.815735 | 0 |
| NFFPGQIGFSRGR                       | 10          | 1         | 1           | 0           | 0.01779      | 2.3174171    | 3           | 1772.88132   | -0.829455726 | 25.189172 | 0 |
| mVPLPGEIPQEQGmGFRPFLPMSQPGSGNSGLR   | 6           | 1         | 1           | 0           | 0.01746      | 2.307374     | 5           | 3853.839241  | 3.71301719   | 28.897056 | 1 |
| IQQFYYEK                            | 26          | 1         | 1           | 0           | 0.01955      | 2.3067892    | 2           | 1255.882445  | -1.55494122  | 21.631823 | 0 |
| vVYVSTEmANK                         | 4           | 1         | 1           | 0           | 0.0004646    | 2.2854722    | 2           | 1445.698534  | 0.264665742  | 27.923884 | 0 |
| LQEQFEK                             | 38          | 1         | 1           | 0           | 0.008841     | 2.2551405    | 2           | 1213.57097   | -2.151737835 | 18.867539 | 0 |
| EAGAGPEmANK                         | 32          | 1         | 1           | 0           | 0.003966     | 2.1014458    | 2           | 1147.528612  | -1.249858269 | 14.703243 | 0 |
| LQEQFEK                             | 2           | 1         | 1           | 0           | 0.003602     | 2.003207     | 3           | 1525.770695  | -3.36010378  | 18.875621 | 2 |
| ERSISADSFQR                         | 1           | 1         | 1           | 0           | 0.02896      | 2.0018198    | 2           | 1452.670214  | -0.834797612 | 19.962851 | 1 |
| GIPPMQGR                            | 96          | 1         | 1           | 0           | 0.0171       | 1.9818077    | 2           | 1009.526465  | -0.18477338  | 20.894819 | 0 |
| iPSEKPSQTLVYPR                      | 6           | 1         | 1           | 0           | 0.01585      | 1.9307104    | 3           | 1946.040134  | 0.96501093   | 24.1703   | 0 |
| gPFGMGQR                            | 23          | 1         | 1           | 0           | 0.02156      | 1.908993     | 2           | 1051.533739  | -1.576074013 | 21.191279 | 0 |
| iKQEQVVVQoSSLQDmMvHQHSPR            | 1           | 1         | 1           | 0           | 0.02276      | 1.8753393    | 5           | 2960.42707   | -4.4195194   | 26.08086  | 2 |
| GIPPMQGR                            | 71          | 1         | 1           | 0           | 0.02821      | 1.7385379    | 2           | 1025.519701  | -0.044251649 | 11.128026 | 2 |
| gmAPHNmPSQMR                        | 7           | 1         | 1           | 0           | 0.009153     | 1.6446081    | 3           | 1558.655247  | -0.500267981 | 9.714201  | 0 |
| MLPDEK                              | 11          | 1         | 1           | 0           | 0.02399      | 1.514625     | 2           | 879.4260119  | -2.398548317 | 20.404598 | 0 |
| sPnLPMNMPMGmGmTQNPR                 | 0.06081     | 0.001     | 2.4824042   | 3           | 232.1253304  | -2.96366863  | 25.736869   |              |              |           |   |
| aEAVLK                              | 6           | 1         | 1           | 0.001       | 0.06721      | 2.3521497    | 2           | 743.4285144  | -1.764667819 | 14.129244 | 0 |
| SSTPSHQTTATEFPQAKTAKVYVSTEmANK      | 1           | 1         | 1           | 0.001       | 0.05687      | 2.208923     | 4           | 3691.81434   | -3.527014606 | 28.495579 | 2 |
| mLRLEPGDPR                          | 6           | 1         | 1           | 0.001       | 0.03479      | 2.305644     | 2           | 1336.694139  | -0.032555014 | 18.371322 | 1 |
| KQEQVVVQoSSLQDmMvHQHSPR             | 6           | 1         | 1           | 0.001       | 0.0313       | 2.0363495    | 4           | 3189.60729   | 5.620895929  | 28.287123 | 1 |
| NRQSR                               | 9           | 1         | 1           | 0.002       | 0.06023      | 1.926295     | 2           | 788.40703    | -1.13942633  | 10.817018 | 0 |
| ecNSADHK                            | 2           | 1         | 1           | 0.001       | 0.05528      | 1.883585     | 2           | 1115.47661   | -1.820030319 | 10.935963 | 0 |
| gmAPHNmPSQMR                        | 2           | 1         | 1           | 0.001       | 0.0474       | 1.8417019    | 3           | 1584.676182  | 2.843049787  | 13.491717 | 0 |
| alPGPGCSmgLk                        | 4           | 1         | 1           | 0.001       | 0.06007      | 1.7383932    | 2           | 1126.590746  | -1.633653631 | 23.60885  | 0 |
| EFPDQR                              | 17          | 1         | 1           | 0.04459     | 1.7078051    | 2            | 911.4572819 | -0.979683401 | 11.978901    | 0         |   |
| mPQSR                               | 6           | 1         | 1           | 0.001       | 0.05407      | 1.539983     | 2           | 830.4180774  | -1.046359804 | 14.732091 | 0 |
| sLQTLR                              | 14          | 4         | 1           | 0.001       | 0.06237      | 1.2782921    | 2           | 759.4350451  | -1.199763775 | 15.733527 | 0 |
| TPAKVYVSTEmANK                      | 1           | 1         | 1           | 0.002       | 0.08662      | 2.5137446    | 3           | 1800.917881  | -1.246846396 | 27.000763 | 1 |
| SLQTLRQDR                           | 4           | 1         | 1           | 0.002       | 0.0806       | 2.4898689    | 2           | 1229.69536   | -0.610884024 | 18.916038 | 0 |
| alPFPVPSGFEPLGENPDGSLQEQLEHR        | 0.07456     | 0.001     | 2.87423978  | 2           | 3174.232778  | -2.579216004 | 11.200146   |              |              |           |   |
| gERFPNPGQLEElEQQLAEK                | 1           | 1         | 1           | 0.002       | 0.0751       | 1.9535891    | 3           | 2621.240001  | 9.091121077  | 28.35311  | 1 |
| gDVLNLVnmGNSmQPQK                   | 5           | 1         | 1           | 0.002       | 0.08604      | 1.901212     | 3           | 2103.978489  | -0.657115945 | 19.78527  | 0 |
| sPThHQVQSPmlGSPLNGK                 | 2           | 1         | 1           | 0.002       | 0.07575      | 1.8299329    | 3           | 2170.035984  | -4.224611685 | 19.383269 | 0 |
| SQSDQPTPHmTNSAATAFSPSTSHQTTATEFPQAK | 0.08841     | 0.002     | 6.405630744 | 3           | 4056.9696972 | 1.045996972  | 10.6459885  |              |              |           |   |
| alPDEK                              | 6           | 1         | 1           | 0.002       | 0.08831      | 0.940451     | 2           | 895.4214343  | -1.789084214 | 19.390834 | 0 |
| QLGLPGMAMeGRPsmEMNR                 | 6           | 1         | 1           | 0.003       | 0.1072       | 2.4277134    | 3           | 2347.096775  | -2.525002044 | 24.015156 | 0 |
| GMaADVgmsGFSGFGmPmGMMFM             | 1           | 1         | 1           | 0.003       | 0.1103       | 1.6815352    | 2           | 2245.905321  | -3.64452752  | 29.343429 | 0 |
| MSKFMPSSTPL_YHDAlK                  | 1           | 1         | 1           | 0.004       | 0.1353       | 1.9071901    | 3           | 2023.996372  | -0.839553574 | 25.106887 | 0 |
| MLPDEKAAMmGSQSLGK                   | 1           | 1         | 1           | 0.004       | 0.1444       | 1.535557     | 2           | 1958.871775  | -2.171330457 | 29.314581 | 0 |
| alPGPGCSngLk                        | 2           | 1         | 1           | 0.005       | 0.1624       | 1.612007     | 2           | 1142.586107  | -1.220153937 | 18.722461 | 0 |
| TNSRLSHmPLPNSPNTLNTAPPVQR           | 1           | 1         | 1           | 0.006       | 0.1816       | 3.5827794    | 4           | 3239.680319  | 6.547639092  | 25.584538 | 1 |
| GMaADVgmsGFSGFGmPmGMMFM             | 2           | 1         | 1           | 0.006       | 0.176        | 1.6014992    | 2           | 2229.916707  | -1.02424819  | 21.266718 | 0 |
| mVPLPGEIPQEQGmGFRPFLPMSQPGSGNSGLR   | 0.21177     | 0.007     | 3869.655123 | 1           | 911.5030923  | 28.897056    |             |              |              |           |   |
| AGADVVYVYEDPAGHQAELK                | 3           | 1         | 1           | 0           | 0.247E-07    | 5.4068353    | 3           | 2313.100498  | 0.452517966  | 23.693513 | 0 |
| THEAEVGENHTYrR                      | 1           | 1         | 1           | 0           | 7.484E-08    | 5.3695741    | 3           | 2057.927773  | -0.885300952 | 22.161704 | 0 |
| ATAPQHGAPGADASK                     | 5           | 1         | 1           | 0           | 5.133E-08    | 5.040493     | 3           | 1789.826633  | -1.157668602 | 12.187872 | 0 |
| VHGPIQSGTINKNFVTETR                 | 1           | 1         | 1           | 0           | 0.0009744    | 4.6855116    | 4           | 2568.235341  | -1.4103703   | 21.90097  | 0 |
| KTHQDNKGTTYAVYVDVGTGR               | 1           | 1         | 1           | 0.00051     | 4.49861      | 4            | 3869.254246 | 0.27474274   | 23.656105    | 0         |   |
| TGVAVNKAEFTVDAK                     | 4           | 1         | 1           | 0           | 0.00004068   | 4.3594875    | 3           | 1646.871433  | -2.105945738 | 20.405026 | 0 |
| GAGTGLLAVEGPEAK                     | 2           | 1         | 1           | 0           | 0.0001837    | 4.306024     | 2           | 1570.804125  | -1.97768126  | 21.72173  | 0 |
| SPFSVSPSLDLK                        | 2           | 1         | 1           | 0           | 0.0007014    | 4.2648196    | 2           | 1533.810594  | -3.505534692 | 26.691743 | 0 |
| TVGLKQFHTVTNAK                      | 2           | 1         | 1           | 0.000004216 | 4.188396     | 3            | 1693.818867 | -0.491507096 | 21.218988    | 0         |   |
| VOVQDNEGPEVALK                      | 2           | 1         | 1           | 0           | 0.00001635   | 4.1054153    | 2           | 1784.880052  | -2.668424935 | 23.320838 | 0 |
| SPYTVVQAEpSArR                      | 2           | 1         | 1           | 0           | 0.00001788   | 4.1050954    | 2           | 1867.841112  | -0.801592874 | 20.160963 | 0 |
| VHGPIQSGTINKNFVTETR                 | 5           | 1         | 1           | 0           | 0.002584     | 4.0566754    | 4           | 1634.859884  | -0.658963391 | 17.733766 | 0 |
| DAGEGLLAVQDTEPKFK                   | 4           | 1         | 1           | 0           | 0.0003812    | 4.0309       | 2           | 1938.011888  | -3.133562772 | 25.021703 | 0 |
| VTAQGLELPGSNGAK                     | 0.004018    | 0.002     | 4.0505462   | 2           | 1652.883224  | -1.02362014  | 18.163227   |              |              |           |   |
| ATAPQHGAPGADASK                     | 2           | 1         | 1           | 0           | 0.00001843   | 3.9847832    | 3           | 1831.838352  | -0.501286896 | 13.521827 | 0 |
| NGQHVASSPPVVISQEGSDAR               | 0.000001339 | 3.870335  | 3           | 2448.245303 | -1.775930118 | 25.392097    |             |              |              |           |   |
| FAQPTDKKGTVYPR                      | 3           | 1         | 1           | 0           | 0.00009196   | 3.7995832    | 3           | 1814.958042  | -1.492781152 | 19.490036 | 1 |
| VTAQGLELPGSNGAK                     | 0.0000312   | 3.7992232 | 2           | 1579.671801 | -1.81258485  | 23.1146      |             |              |              |           |   |
| FNQEEHTSGVSPASGIDAR                 | 2           | 1         | 1           | 0           | 0.000296     | 3.6491153    | 3           | 2467.185567  | -2.182420832 | 27.688581 | 0 |
| EAGAGGLAVGEPK                       | 1           | 1         | 1           | 0           | 0.005496     | 3.6273305    | 2           | 1426.752001  | -1.212948185 | 22.001826 | 0 |
| VSGQLGHEFTFEAFHIDTR                 | 5           | 1         | 1           | 0           | 0.00004792   | 3.5660398    | 3           | 2440.182285  | -2.86297099  | 29.086394 | 0 |
| DAGEGLLAVGEPK                       | 1           | 1         | 1           | 0           | 0.001197     | 3.5630229    | 2           | 1500.529001  | -1.41309111  | 24.230305 | 0 |
| GRLYDQSKLTK                         | 0.001106    | 3.467859  | 2           | 1292.71892  | -1.66385963  | 23.38348     |             |              |              |           |   |
| YAPSEALEHMIDR                       | 3           | 1         | 1           | 0           | 0.002014     | 3.4061937    | 2           | 1588.737963  | -2.85047734  | 22.444471 | 0 |
| VANPNSLNETVYQDR                     | 1           | 1         | 1           | 0           | 0.0003503    | 3.3960795    | 2           | 1763.853563  | -1.342558003 | 21.182122 | 0 |
| VQDQKQEFYK                          | 2           | 1         | 1           | 0           | 0.00002129   | 3.3296652    | 2           | 1364.702562  | -2.292846001 | 18.830083 | 1 |
| FADQVPSQFSYK                        | 0.001194    | 3.2873626 | 2           | 1515.758226 | -0.590845717 | 32.767994    |             |              |              |           |   |
| YKQHVPSGFQFVCPGLEGGAAK              | 2           | 1         | 1           | 0           | 0.002483     | 3.2409487    | 4           | 2905.303121  | -2.801217348 | 30.063978 | 1 |
| DVDIDHDNTVYK                        | 3           | 1         | 1           | 0           | 0.00005992   | 3.2355013    | 2           | 1784.848431  | -0.890785242 | 21.164309 | 0 |
| ETGEHLVHVK                          | 1           | 1         | 1           | 0           | 0.01194      | 3.2284777    | 2           | 1148.602831  | -0.664556645 | 16.185553 | 0 |
| VEPLGADNSVYK                        | 1           | 1         | 1           | 0           | 0.00144      | 3.1806929    | 2           | 1312.683885  | -1.23995098  | 18.91805  | 0 |
| IANLQTLSDGLK                        | 1           | 1         | 1           | 0           | 0.0009364    | 3.1424956    | 2           | 1415.467532  | -1.55366748  | 24.74668  | 0 |
| VNPQASFAVSLNGAK                     | 1           | 1         | 1           | 0           | 0.005112     | 3.0953095    | 2           | 1502.797167  | 0.61581232   | 23.609564 | 0 |
| AFPGPLGQGSAGSAPAR                   | 1           | 1         | 1           | 0           | 0.0007466    | 3.0880475    | 2           | 1429.714159  | -2.92523119  | 18.613821 | 0 |
| YGGDEPSPYR                          | 1           | 1         | 1           | 0           | 0.005135     | 3.06831      | 2           | 1400.645189  | -2.114810882 | 25.24205  | 0 |
| VNEHQVPSPTAR                        | 1           | 1         | 1           | 0           | 0.000747     | 3.0364602    | 3           | 1602.65672   | -0.162937004 | 20.73111  | 0 |
| VPHVDVDAK                           | 6           | 1         | 1           | 0           | 0.002108     | 3.015404     | 2           | 1167.598436  | -1.175483482 | 11.991504 | 0 |
| EGPYSIVLYGDEEVPK                    | 1           | 1         | 1           | 0           | 0.0004135    | 2.9907458    | 2           | 1909.911547  | -3.311502998 | 27.503289 | 0 |
| IEpDKGDSdDVR                        | 3           | 2         | 1           | 0           | 0.0004336    | 2.9674132    | 3           | 1625.65134   | -1.082024951 | 11.387294 | 1 |
| RAEFTVETR                           | 1           | 1         | 1           | 0           | 0.0009887    | 2.926645     | 2           | 1108.576997  | 1.34957219   | 17.189105 | 1 |
| alNLPSPQVDSK                        | 1           | 1         | 1           | 0           | 0.006974     |              |             |              |              |           |   |

70 kDa HSP68

Table with 10 columns: Name, 1, 2, 3, 4, 5, 6, 7, 8, 9, 10. Rows list protein names like L1GWQNK, SPPEV, AYDGNL, FTVETR, MREIHQAQQGQGNQIAK, etc., with associated numerical values.



|         |       |  |  |                   |   |    |   |       |           |           |   |             |              |           |   |
|---------|-------|--|--|-------------------|---|----|---|-------|-----------|-----------|---|-------------|--------------|-----------|---|
|         |       |  |  | AIPELTK           | 6 | 2  | 2 | 0.001 | 0.05639   | 1.2609464 | 2 | 771.464123  | 0.377264292  | 17.440623 | 0 |
|         |       |  |  | LKGDVAIVEDLESVGG  | 2 | 1  | 1 | 0     | 0.0003394 | 3.920903  | 2 | 1459.765795 | 1.262784119  | 23.81667  | 1 |
|         |       |  |  | ENAGCEPGLAR       | 7 | 1  | 1 | 0     | 0.007945  | 2.8693871 | 2 | 1128.526151 | -1.85894427  | 13.185664 | 0 |
|         |       |  |  | DAVEDLESVGG       | 4 | 1  | 1 | 0     | 0.002938  | 2.5759482 | 2 | 1161.560472 | -2.455955228 | 23.480844 | 0 |
| 292 kDa | USP9X |  |  | MTDIDQDELIR       | 1 | 1  | 1 | 0     | 0.0009867 | 3.5356717 | 2 | 1463.663988 | -2.967396614 | 23.361998 | 0 |
|         |       |  |  | DHEDYDPQTIVR      | 1 | 1  | 1 | 0     | 0.004883  | 3.2197847 | 2 | 1374.588549 | -2.57729827  | 15.323319 | 0 |
|         |       |  |  | VVKSNSDDASR       | 1 | 1  | 1 | 0     | 0.002757  | 2.7222374 | 2 | 1316.675707 | -3.664168434 | 17.190378 | 0 |
|         |       |  |  | LAQQISDEASR       | 1 | 1  | 1 | 0     | 0.0004951 | 2.7093291 | 2 | 1217.609301 | -2.308434702 | 15.108208 | 0 |
|         |       |  |  | ELLAFQTSK         | 1 | 2  | 1 | 0     | 0.01886   | 2.5151472 | 2 | 1165.607958 | -1.73604254  | 22.723348 | 0 |
|         |       |  |  | GIIPDRDGLFDFTIQR  | 1 | 2  | 1 | 0     | 0.005093  | 2.4056764 | 3 | 1717.84769  | -1.624647908 | 24.839388 | 1 |
|         |       |  |  | YSHVQVQER         | 2 | 2  | 1 | 0     | 0.006167  | 2.2714727 | 3 | 1274.612156 | -0.208550143 | 13.59057  | 0 |
|         |       |  |  | VISSVSYTHR        | 1 | 2  | 1 | 0     | 0.003499  | 2.247093  | 2 | 1311.667828 | -1.268029028 | 19.657919 | 0 |
|         |       |  |  | VPGQEETVK         | 2 | 1  | 1 | 0     | 0.01606   | 2.0946417 | 2 | 986.5132922 | -2.087222098 | 10.948325 | 0 |
|         |       |  |  | YMPDKVIR          | 1 | 2  | 1 | 0     | 0.006601  | 1.8456138 | 2 | 1166.568651 | -0.912235747 | 24.832659 | 0 |
|         |       |  |  | FDDKDVTEK         | 1 | 2  | 1 | 0     | 0.008454  | 1.5517612 | 2 | 1185.471727 | -0.993708853 | 16.051228 | 0 |
|         |       |  |  | ELDMETTYAGVAK     | 1 | 1  | 1 | 0.001 | 0.03392   | 1.8431027 | 2 | 1522.745653 | -0.15018966  | 24.667711 | 0 |
|         |       |  |  | mNALNEVVK         | 1 | 1  | 1 | 0.001 | 0.04621   | 1.5148001 | 2 | 1048.505663 | -3.398614811 | 13.404343 | 0 |
|         |       |  |  | EYNGVLR           | 1 | 2  | 1 | 0.002 | 0.07383   | 1.6832805 | 2 | 963.525072  | -0.798409102 | 22.671677 | 0 |
|         |       |  |  | LAEDDKDQVMMAHK    | 1 | 2  | 1 | 0.002 | 0.0719    | 1.3517032 | 3 | 1428.678745 | -0.067342051 | 14.454421 | 1 |
|         |       |  |  | FLTTTGHTIK        | 1 | 2  | 1 | 0.002 | 0.07496   | 1.259172  | 2 | 1198.63926  | -0.53041738  | 25.205101 | 0 |
|         |       |  |  | HSGDYFTLLR        | 1 | 1  | 1 | 0.009 | 0.2255    | 1.5278926 | 2 | 1208.611376 | 4.546663243  | 26.272431 | 0 |
|         |       |  |  | EGALLENMR         | 1 | 1  | 1 | 0     | 0.001024  | 3.0643251 | 2 | 1208.303221 | -0.234896457 | 15.838777 | 0 |
|         |       |  |  | TGTTTTFHAHNMNR    | 1 | 1  | 1 | 0     | 0.00119   | 2.6350236 | 3 | 1615.762729 | -1.164672957 | 20.327868 | 0 |
|         |       |  |  | GGQLCPFAER        | 5 | 1  | 1 | 0     | 0.006537  | 2.6324558 | 2 | 1013.500963 | -0.146200064 | 12.28021  | 0 |
|         |       |  |  | KVEDMMK           | 1 | 1  | 1 | 0.001 | 0.05092   | 1.5047021 | 2 | 880.4264392 | -0.55448955  | 13.784505 | 1 |
|         |       |  |  | STLTDLSLVK        | 1 | 1  | 1 | 0.003 | 0.1002    | 2.1122167 | 2 | 1123.564867 | -1.560282221 | 20.17542  | 0 |
|         |       |  |  | TILMMGR           | 2 | 1  | 1 | 0.003 | 0.1241    | 1.361734  | 2 | 821.4366931 | -0.679533118 | 21.661154 | 0 |
|         |       |  |  | NPADLPK           | 1 | 1  | 1 | 0.003 | 0.127     | 1.325808  | 2 | 754.408676  | -1.794562729 | 12.070229 | 0 |
|         |       |  |  | GGGQIFPAR         | 1 | 2  | 1 | 0.009 | 0.2377    | 1.8636713 | 2 | 969.5473498 | -0.321237695 | 16.400389 | 0 |
| 45 kDa  | PYGO1 |  |  | APPPKQDFTQGATK    | 5 | 1  | 1 | 0     | 0.0006471 | 2.9244947 | 3 | 1485.767826 | -1.255512185 | 14.319348 | 1 |
|         |       |  |  | QDFTQGATK         | 2 | 1  | 1 | 0     | 0.01401   | 2.5260746 | 2 | 995.4783191 | -0.976632897 | 11.934501 | 0 |
|         |       |  |  | TRETGFPSAVGSDA    | 1 | 1  | 1 | 0.001 | 0.05422   | 3.2588558 | 2 | 1394.647386 | -5.259274949 | 19.417932 | 1 |
|         |       |  |  | ILEGEER           | 6 | 11 | 6 | 0     | 0.02836   | 2.2833698 | 2 | 1005.464647 | 2.365167071  | 13.706914 | 0 |
|         |       |  |  | YLDFFSITVVR       | 1 | 1  | 1 | 0     | 0.004597  | 2.1380868 | 2 | 1442.752928 | 0.12235317   | 30.748667 | 0 |
|         |       |  |  | ILEGEER           | 1 | 11 | 6 | 0.002 | 0.08517   | 1.660904  | 2 | 1047.476854 | -0.702698701 | 19.223025 | 0 |
|         |       |  |  | FLEQQNK           | 4 | 18 | 6 | 0.002 | 0.08188   | 1.6090606 | 2 | 906.4675769 | -0.457164035 | 11.784258 | 0 |
| 531 kDa | PLEC  |  |  | AALAHSEVTASOVAATK | 1 | 1  | 1 | 0     | 0.007586  | 3.2621834 | 3 | 1783.917637 | -0.512696649 | 18.57208  | 0 |
|         |       |  |  | AQVEQLTLR         | 1 | 1  | 1 | 0     | 0.003345  | 2.7809076 | 2 | 1287.689867 | -0.383916442 | 21.889244 | 0 |
|         |       |  |  | LAAEQELIR         | 1 | 1  | 1 | 0     | 0.006986  | 2.3821778 | 2 | 1042.587694 | -1.436058457 | 19.72021  | 0 |
|         |       |  |  | VLADPSDDTK        | 1 | 2  | 2 | 0     | 0.001618  | 1.8818161 | 2 | 1060.51917  | 0.153998955  | 12.223227 | 0 |
|         |       |  |  | LKQSAEIQQAAR      | 2 | 1  | 1 | 0     | 0.006551  | 1.8080974 | 2 | 1358.700609 | -1.267518246 | 9.9656888 | 1 |
|         |       |  |  | VPVDVAYR          | 1 | 2  | 2 | 0.001 | 0.04824   | 1.9940602 | 2 | 918.5029162 | -1.595040016 | 17.616299 | 0 |
|         |       |  |  | LRAETEQQEQQR      | 1 | 1  | 1 | 0.001 | 0.04977   | 1.5659206 | 2 | 1444.713549 | -0.285679253 | 9.9093409 | 1 |
|         |       |  |  | SLAAEFAAR         | 1 | 1  | 1 | 0.004 | 0.1496    | 2.2659698 | 2 | 1046.308337 | -2.393327856 | 14.494272 | 0 |
|         |       |  |  | LKAATEAAR         | 1 | 1  | 1 | 0.005 | 0.1531    | 2.1650174 | 2 | 1059.578173 | -1.121862719 | 10.292358 | 1 |
|         |       |  |  | KILSDGK           | 1 | 4  | 2 | 0     | 0.01775   | 2.3071144 | 2 | 1002.580797 | -2.238412642 | 15.485365 | 1 |
|         |       |  |  | GPQNAFLVK         | 1 | 1  | 1 | 0     | 0.013     | 2.0757222 | 2 | 1120.612718 | -0.046026049 | 26.113433 | 0 |
|         |       |  |  | NELIAR            | 1 | 5  | 2 | 0.003 | 0.09547   | 1.8241816 | 2 | 715.4086169 | -1.585618744 | 13.428258 | 0 |
| 555 kDa | EPPK1 |  |  | VLADPSDDTK        | 1 | 2  | 2 | 0     | 0.001618  | 1.8818161 | 2 | 1060.51917  | 0.153998955  | 12.223227 | 0 |
|         |       |  |  | DATMEVQR          | 1 | 1  | 1 | 0.001 | 0.05574   | 2.2227089 | 2 | 949.4413928 | 0.612479715  | 12.396921 | 0 |
|         |       |  |  | VPVDVAYR          | 1 | 2  | 2 | 0.001 | 0.04824   | 1.9940602 | 2 | 918.5029162 | -1.595040016 | 17.616299 | 0 |
|         |       |  |  | IGAVN-GDDR        | 1 | 1  | 1 | 0.003 | 0.1057    | 1.5694617 | 2 | 1076.479296 | 0.27900734   | 11.916962 | 0 |
| 126 kDa | DDB1  |  |  | TVPLYESPR         | 1 | 1  | 1 | 0.001 | 0.0428    | 1.5941503 | 2 | 1061.560839 | -1.679306131 | 18.23518  | 0 |
|         |       |  |  | VVEELTR           | 1 | 1  | 1 | 0.001 | 0.06705   | 1.5701001 | 2 | 845.4722766 | -0.561458201 | 14.513986 | 0 |
|         |       |  |  | YLLGDMEGR         | 1 | 1  | 1 | 0.004 | 0.1518    | 1.0943807 | 2 | 1053.501512 | -1.802425035 | 22.923411 | 0 |
|         |       |  |  | YFLNHEK           | 1 | 1  | 1 | 0.004 | 0.1361    | 1.4334545 | 2 | 1063.554003 | -2.941668328 | 21.575593 | 0 |
