# Supplementary material
Source: PubMed Central journal article supplement (PMC6597819)
Supplement: supp_RA119.007655_143246_1_supp_321651_pqzl1z.pdf [file supp_RA119.007655_143246_1_supp_321651_pqzl1z.pdf]

**Supplementary Table 2. Lentiviral shRNA sequences**

| shRNAs     | Sequences                                                        |
|------------|------------------------------------------------------------------|
| Luciferase | 5'-CCGGGATATGG GCTGAATACAAACTCGAGTTTGTATTCAGCCCATATCTTTTTG-3'    |
| USP9X-1    | 5'-CCGGGGTCGTTACAGCTAGTATTTACTCGAGTAAATACTAGCTGTAACGACCTTTTTG-3' |
| USP9X-2    | 5'-CCGGCGCCTGATTCTTCCAATGAAACTCGAGTTTCATTGGAAGAATCAGGCGTTTTTG-3' |

**Supplementary Table 3. qRT-PCR Primers**

| Genes        | Sequences                        |
|--------------|----------------------------------|
| <i>ACTB</i>  | F: 5'-CATGTACGTTGCTATCCAGGC-3'   |
|              | R: 5'-CTCCTTAATGTCACGCACGAT-3'   |
| <i>USP9X</i> | F: 5'-AAGTGAAGCATGTCAGCGATT-3'   |
|              | R: 5'-GCCACACATAGCTCCACCA-3'     |
| <i>AXIN2</i> | F: 5'-AGCCAAAGCGATCTACAAAAGG-3'  |
|              | R: 5'-AAGTCAAAAACATCTGGTAGGCA-3' |
| <i>c-Myc</i> | F: 5'-GTCAAGAGGCGAACACACAAC-3'   |
|              | R: 5'-TTGGACGGACAGGATGTATGC-3'   |
| <i>LGR5</i>  | F: 5'-TGCTGGCTGGTGTGGATGCG-3'    |
|              | R: 5'-GCCAGCAGGGCACAGAGCAA-3'    |

**Supplementary Table 4. qChIP Primers**

| Genes        | Sequences                       |
|--------------|---------------------------------|
| <i>AXIN2</i> | F: 5'-CTGGAGCCGGCTGCGCTTTGAT-3' |
|              | R: 5'-CGGCCCCGAAATCCATCGCTCT-3' |
| <i>c-Myc</i> | F: 5'-GCTCTCCACTTGCCCCTTTTA-3'  |

R: 5'-GTTCCCAATTCTCAGCC-3'

*LGR5*

F: 5'-CCCCGCAAGAGATAGGAAGG-3'

R: 5'-CCCCGGCGAATGATAGGT-3'

---
